# Supplementary material for: Inactivated Split MERS-CoV Antigen Prevents Lethal Middle East Respiratory Syndrome Coronavirus Infections in Mice
Source: MDPI journal article supplement (doi:10.3390/vaccines12040436), 2024-04-18
Supplement: s1 [file s1]

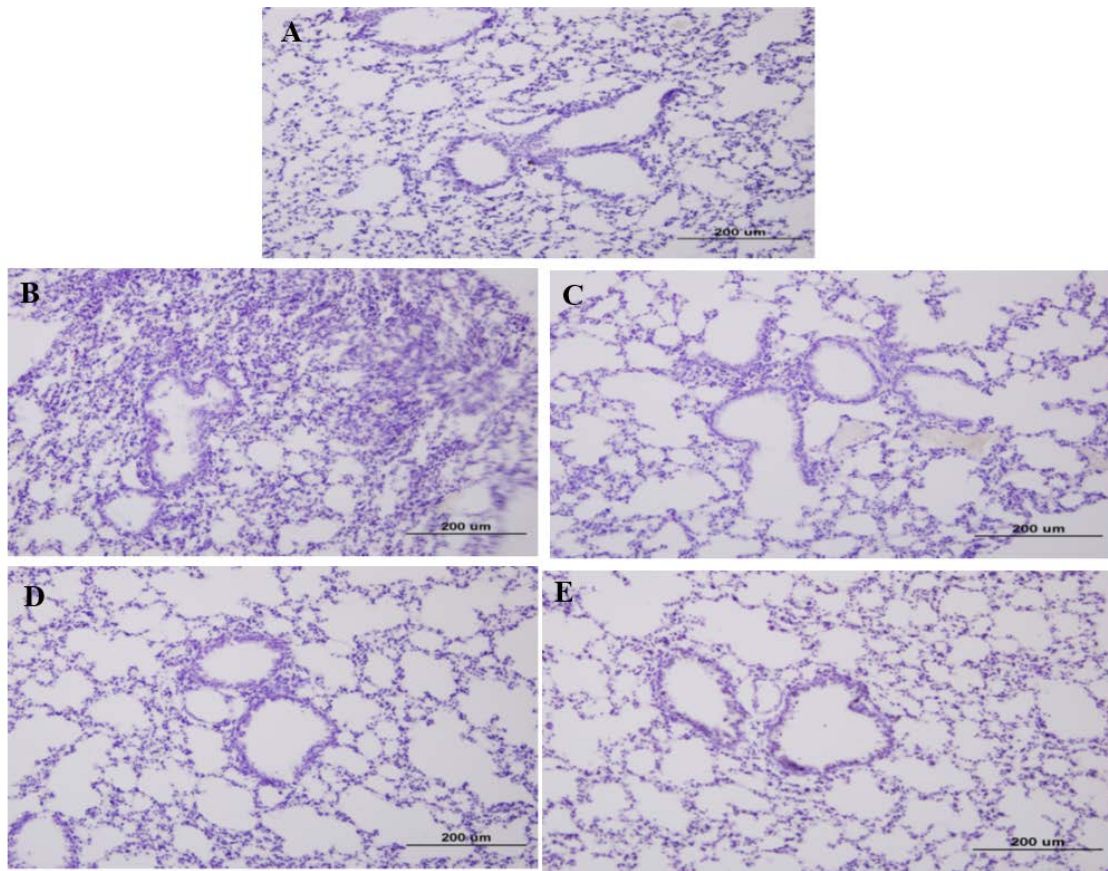

**Figure S1. Lung pathology in the challenged mice.** Lung tissues from Figure 2 were stained with H&E (X200) to observe tissue pathology in the immunized and challenged mice.

**A**, Lung tissue from PBS-mock inoculated and uninfected mouse; **B**, Lung tissue from PBS-mock inoculated and infected mouse; **C**, Lung tissue from the challenged mouse which were inoculated with 15 $\mu$ g spike protein; **D**, Lung tissue from the challenged mouse which were inoculated with 20 $\mu$ g spike protein; **E**, Lung tissue from the challenged mouse which were inoculated with 25 $\mu$ g spike protein.

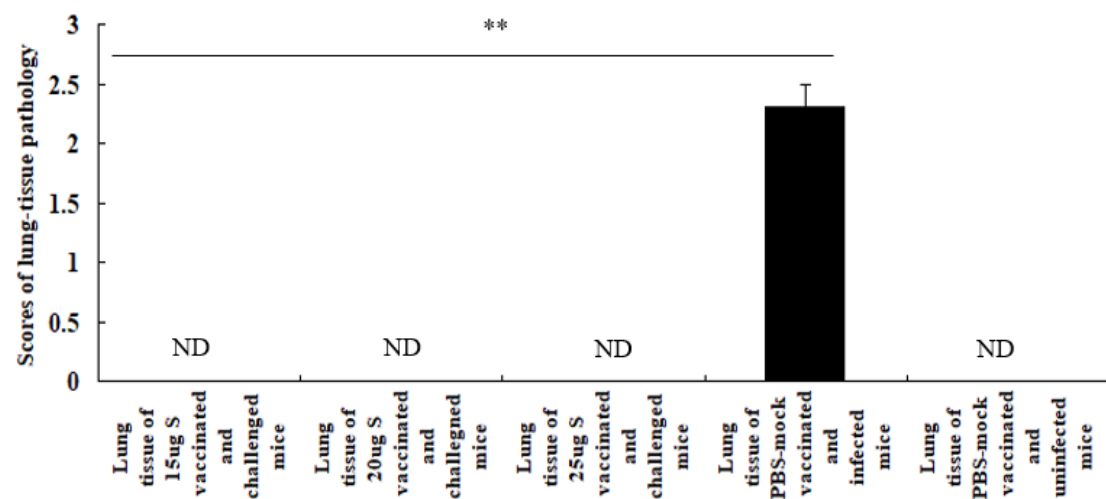

Figure S2. Lung clinical scores of Figure S1. Lung-tissue clinical scores were measured on the basis of the criteria: 0, no clear sign; 1, mild inflammatory exudate and area of patchy edema with some disordered structure; 2, moderate inflammatory exudate and area of moderate alveolar thickening (<50%); 3, moderate-severe inflammatory exudate and severe alveolar thickening (>50%). ND: None-detected. Statistical analysis was performed on data between lung tissue of PBS-mock vaccinated and infected mice and lung-tissue of the immunized and challenged mice. \*\*  $P < 0.01$ .

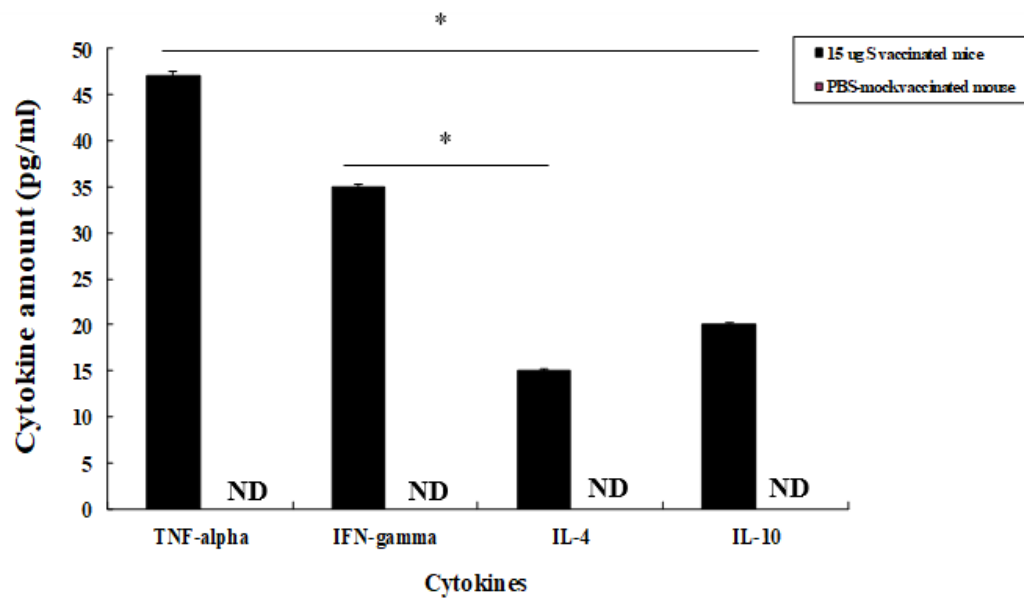

**Figure S3. Cytokine profile in splenocytes in the immunized mice.**

The supernatants from the stimulated splenocytes from the inoculated mice (n=5) with two doses of 15µg spike protein vaccines were used to measure immune stimulatory Th1 cytokines (TNF- $\alpha$ , IFN- $\gamma$ ) and immune regulatory Th2 cytokines (IL-4, IL-10) by ELISA. ND: Non-detected. Statistical analysis was performed data between Th1 cytokines and Th2 cytokines. \*P<0.05
